# Supplementary material for: Zeolite acidity strongly influences hydrogen peroxide activation and oxygenate selectivity in the partial oxidation of methane over M,Fe-MFI (M: Ga, Al, B) zeolites
Source: Royal Society of Chemistry journal article supplement (doi:10.1039/c9cy00619b), 2019-01-01
Supplement: c9cy00619b1.pdf [file c9cy00619b1.pdf]

## Supplementary Information

# **Zeolite Acidity Strongly Influences Hydrogen Peroxide Activation and Oxygenate Selectivity in the Partial Oxidation of Methane over M,Fe-MFI (M: Ga, Al, B) Zeolites**

*Meysam Shahami and Daniel F. Shantz\**

Department of Chemical and Biomolecular Engineering, Tulane University, 6823 St. Charles Avenue, New Orleans, LA 70118, United States.

\*To whom correspondence should be addressed: [dshantz@tulane.edu](mailto:dshantz@tulane.edu)

### **Contents**

#### **Figures:**

**Figure S1.** Left) Calibration curves of methanol/formic acid versus 0.25 vol% acetonitrile based on the  $^1\text{H-NMR}$  spectrum. (**Note:** Moles number was calculated based on the known amounts of methanol/formic acid inside the 10 mL of aqueous solution.) Right) Calibration of carbon dioxide versus methane in gas chromatography using thermal conductivity as the detector.

**Figure S2.**  $^1\text{H-NMR}$  spectrum of organic oxygenates from direct oxidation of methane with  $\text{H}_2\text{O}_2$  over B,Fe-MFI(200) (blue) and Ga,Fe-MFI(100) (red) after 30 min.

**Figure S3.** Ultraviolet-visible spectra of added certain amounts of hydrogen peroxide into 3 mL of  $\text{V}_2\text{O}_5$  solution (0.002 M) (*Green spectrum: 20  $\mu\text{L}$  of 0.5 M  $\text{H}_2\text{O}_2$  added to vanadium pentoxide solution which shows a red-brownish color*).

**Figure S4.** Powder X-ray diffraction patterns of calcined Ga,Fe-MFI, Al,Fe-MFI, B,Fe-MFI, and Na,Fe-MFI zeolites in the range of  $5^\circ \leq 2\theta \leq 50^\circ$ .

**Figure S5.** Ultraviolet-Visible spectra of calcined Ga,Fe-MFI, Al,Fe-MFI, B,Fe-MFI, and Na,Fe-MFI zeolites in the range of 194-1000 nm under ambient conditions.

**Figure S6.**  $\text{N}_2$  adsorption-desorption isotherms of outgassed Ga,Fe-MFI, Al,Fe-MFI, B,Fe-MFI, and Na,Fe-MFI zeolites. ( $60 < v \text{ (cm}^3\text{/g-STP)} < 220$ )

**Figure S7.** FE-SEM images of Ga,Fe-MFI, Al,Fe-MFI, B,Fe-MFI, and Na,Fe-MFI zeolites. The scale bar in all images is 1  $\mu\text{m}$ .

**Figure S8.** FT-IR spectra of pyridine adsorbed at different temperatures over M,Fe-MFI(100) zeolites as well as calculated concentration of Brönsted and Lewis acidities at different temperatures.

**Figure S9.** Hydrogen peroxide consumption (top left), methane conversion (top right), and selectivity profiles (bottom) versus time for a reaction in which Al,Fe-MFI zeolites were used as catalysts. Reaction conditions: CH<sub>4</sub> Pressure: 443 psi, T: 55 °C, Amounts of catalyst 28 mg, Concentration of H<sub>2</sub>O<sub>2</sub>: 0.5 M, Volume of used H<sub>2</sub>O<sub>2</sub>: 10 mL, 1500 rpm.

**Figure S10.** Selectivity profiles versus various catalysts. Conditions are similar for all the reactions: CH<sub>4</sub> Pressure: 443 psi, T: 55 °C, Amounts of catalyst: 28 mg, Concentration of H<sub>2</sub>O<sub>2</sub>: 0.5 M, Volume of H<sub>2</sub>O<sub>2</sub> Solution: 10 mL, 1500 rpm, t: 30 min.

**Figure S11.** Hydrogen peroxide consumption versus various catalysts. Conditions are similar for all the reactions: CH<sub>4</sub> Pressure: 443 psi, T: 55 °C, Amounts of catalyst: 28 mg, Concentration of H<sub>2</sub>O<sub>2</sub>: 0.5 M, Volume of H<sub>2</sub>O<sub>2</sub> Solution: 10 mL, 1500 rpm, t: 30 min. (M: Ga, Al, B)

**Figure S12.** IR spectra of calcined Ga,Fe-MFI, Al,Fe-MFI, B,Fe-MFI, and Na,Fe-MFI materials under the vacuum (10<sup>-5</sup> Torr) at 500 °C for 30 min in the range of 4000-3000 cm<sup>-1</sup>. The indicator shows the Kubelka-Munk Function unit (a.u.).

**Figure S13.** Hydrogen peroxide consumption versus various catalysts. Conditions are similar for all the reactions: CH<sub>4</sub> Pressure: 443 psi, T: 55 °C, Amounts of catalyst: 28 mg, Concentration of H<sub>2</sub>O<sub>2</sub>: 0.5 M, Volume of H<sub>2</sub>O<sub>2</sub> Solution: 10 mL, 1500 rpm, t: 30 min. (M, Al, PNa, Na)

**Figure S14.** Methane conversion/total oxygenated products, hydrogen peroxide consumption, and selectivity profiles as a function of partial pressure of methane over Ga,Fe-MFI(50). T: 55 °C, Weight<sub>catalyst</sub>: 28 mg, Concentration of H<sub>2</sub>O<sub>2</sub>: 0.5 M, Volume of H<sub>2</sub>O<sub>2</sub> Solution: 10 mL, 1500 rpm, t: 30 min.

#### **Tables:**

**Table S1.** Physical properties of calcined Ga,Fe-MFI, Al,Fe-MFI, B,Fe-MFI, and Na,Fe-MFI zeolites.

**Table S2.** Theoretical wt%, actual wt%, and percent uptake of heteroatoms for all samples.

**Table S3.** Catalytic studies of various (Ga/Al/B/Na),Fe-MFI zeolites for oxidation of methane under mild conditions. Conditions are similar for all the reactions: CH<sub>4</sub> Pressure: 443 psi, T: 55 °C,

Weight<sub>Catalyst</sub>: 28 mg, Concentration of H<sub>2</sub>O<sub>2</sub>: 0.5 M, Volume of H<sub>2</sub>O<sub>2</sub> Solution: 10 mL, 1500 rpm, t: 30 min.

**Table S4.** Selectivity profile and turnover frequency for all the reactions in which (Ga/Al/B/Na),Fe-MFI zeolites were used. Conditions are similar for all the reactions: CH<sub>4</sub> Pressure: 443 psi, T: 55 °C, Weight<sub>Catalyst</sub>: 28 mg, Concentration of H<sub>2</sub>O<sub>2</sub>: 0.5 M, Volume of H<sub>2</sub>O<sub>2</sub> Solution: 10 mL, 1500 rpm, t: 30 min.

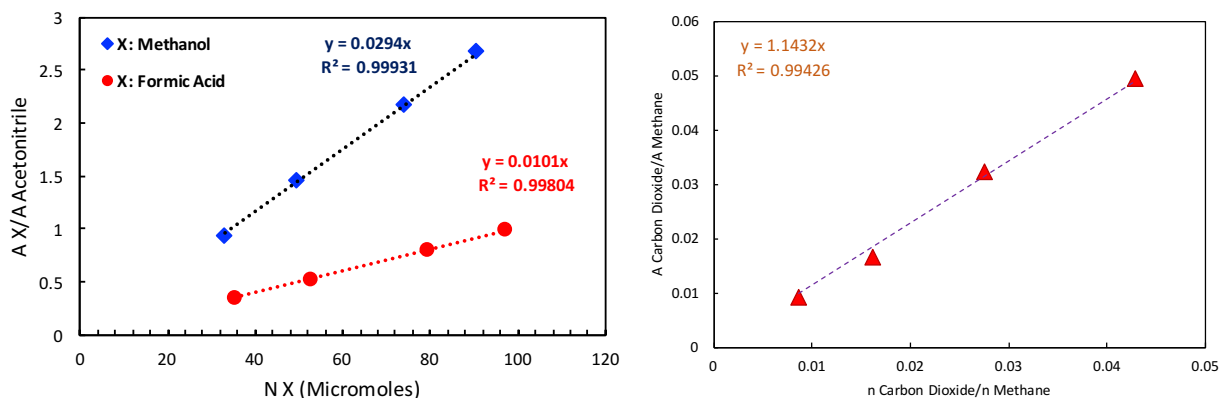

**Figure S1.** Left) Calibration curves of methanol/formic acid versus 0.25 vol% acetonitrile based on the <sup>1</sup>H-NMR spectrum. (**Note:** Moles number was calculated based on the known amounts of methanol/formic acid inside the 10 mL of aqueous solution.) Right) Calibration of carbon dioxide versus methane in gas chromatography using thermal conductivity as the detector.

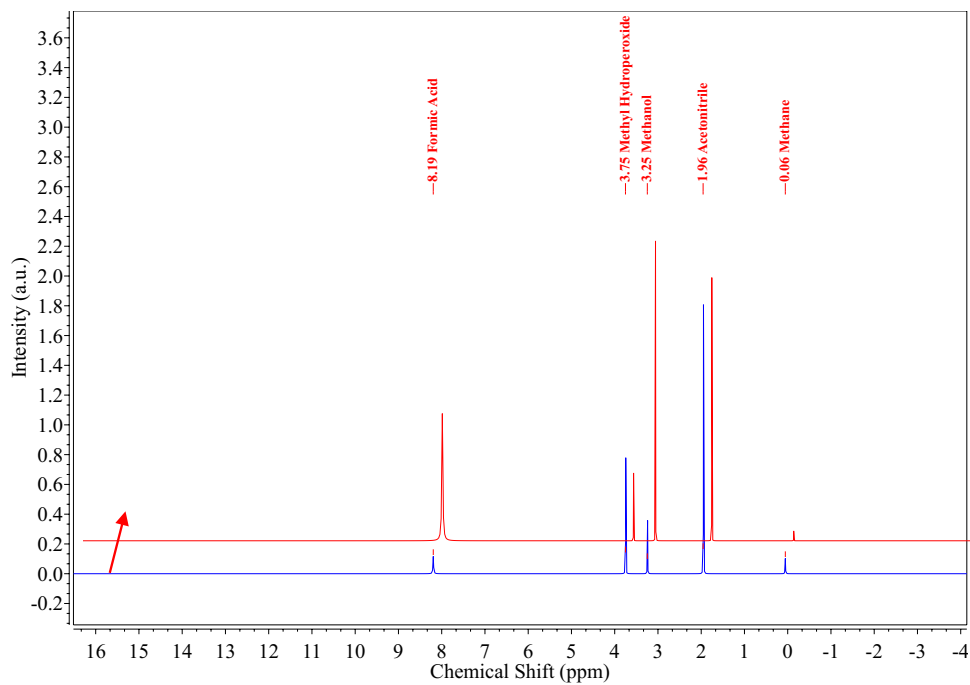

**Figure S2.** <sup>1</sup>H-NMR spectrum of organic oxygenates from direct oxidation of methane with H<sub>2</sub>O<sub>2</sub> over B,Fe-MFI(200) (blue) and Ga,Fe-MFI(100) (red) after 30 min.

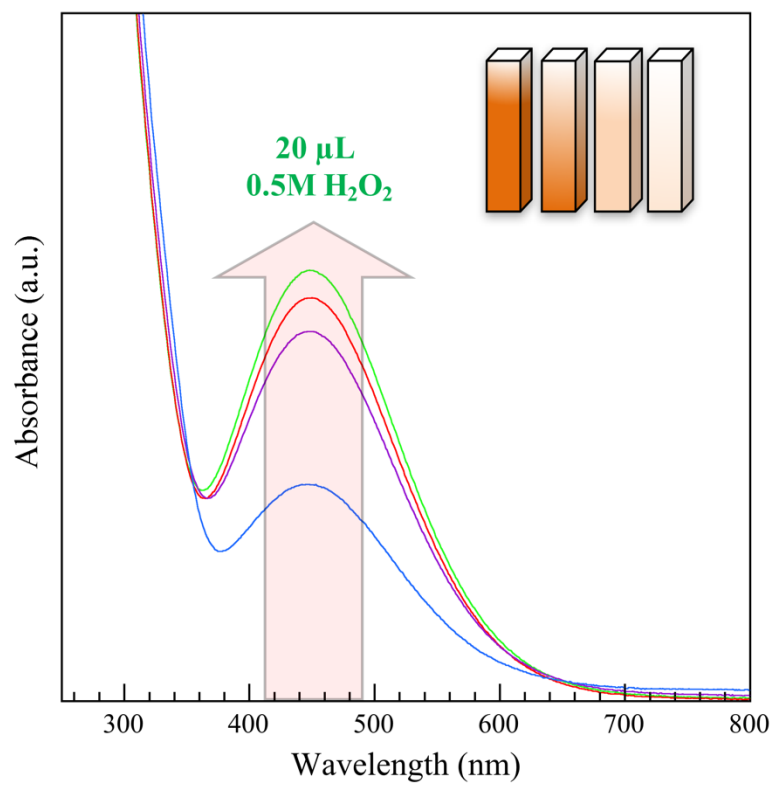

**Figure S3.** Ultraviolet-visible spectra of added certain amounts of hydrogen peroxide into 3 mL of  $V_2O_5$  solution (0.002 M) (*Green spectrum: 20  $\mu$ L of 0.5 M  $H_2O_2$  added to vanadium pentoxide solution which shows a red-brownish color.*

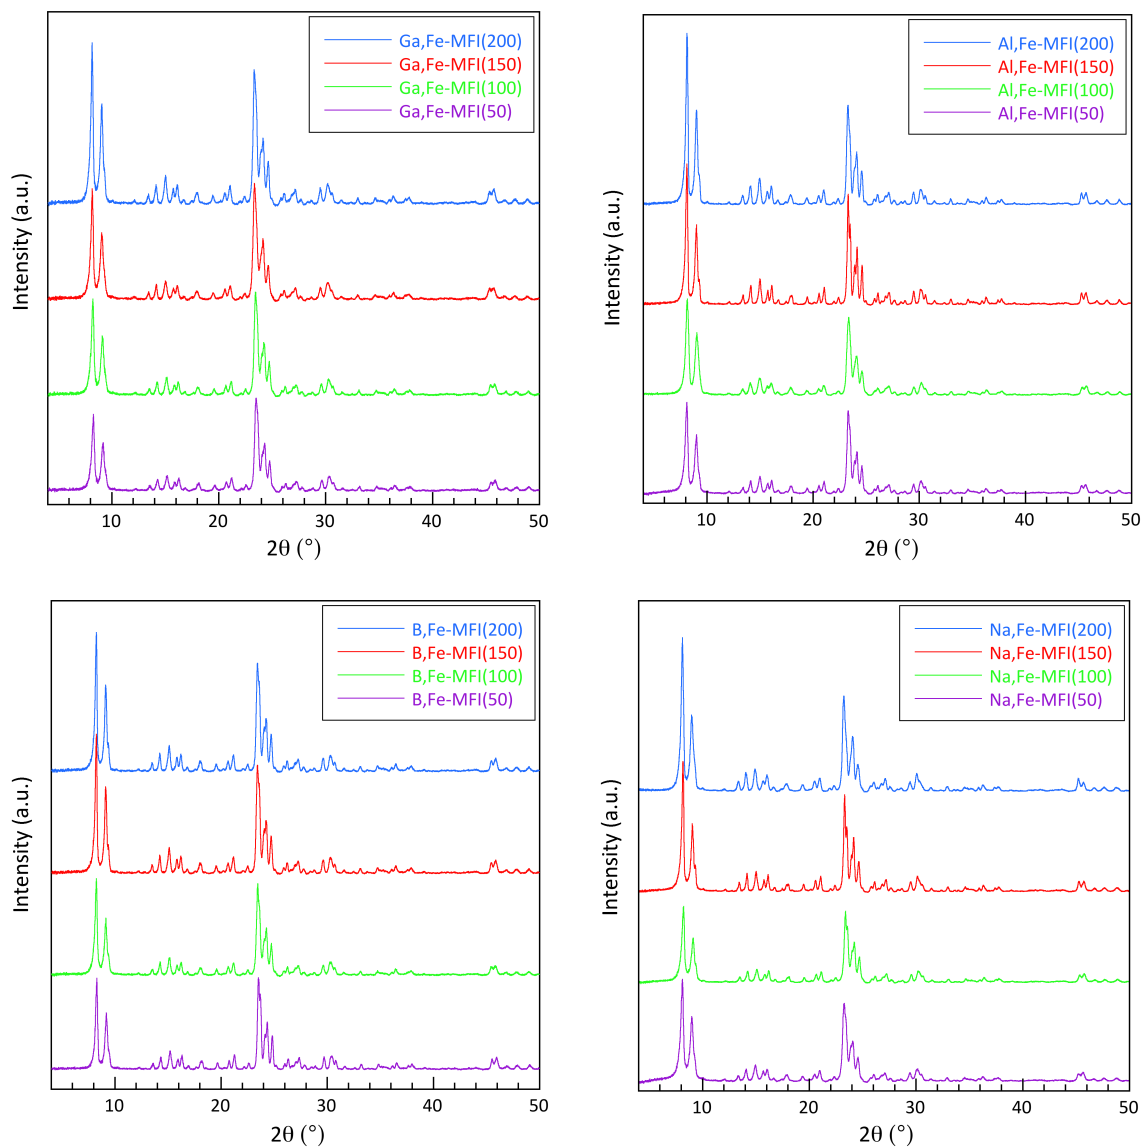

**Figure S4.** Powder X-ray diffraction patterns of calcined Ga,Fe-MFI, Al,Fe-MFI, B,Fe-MFI, and Na,Fe-MFI zeolites in the range of  $5^\circ \leq 2\theta \leq 50^\circ$ .

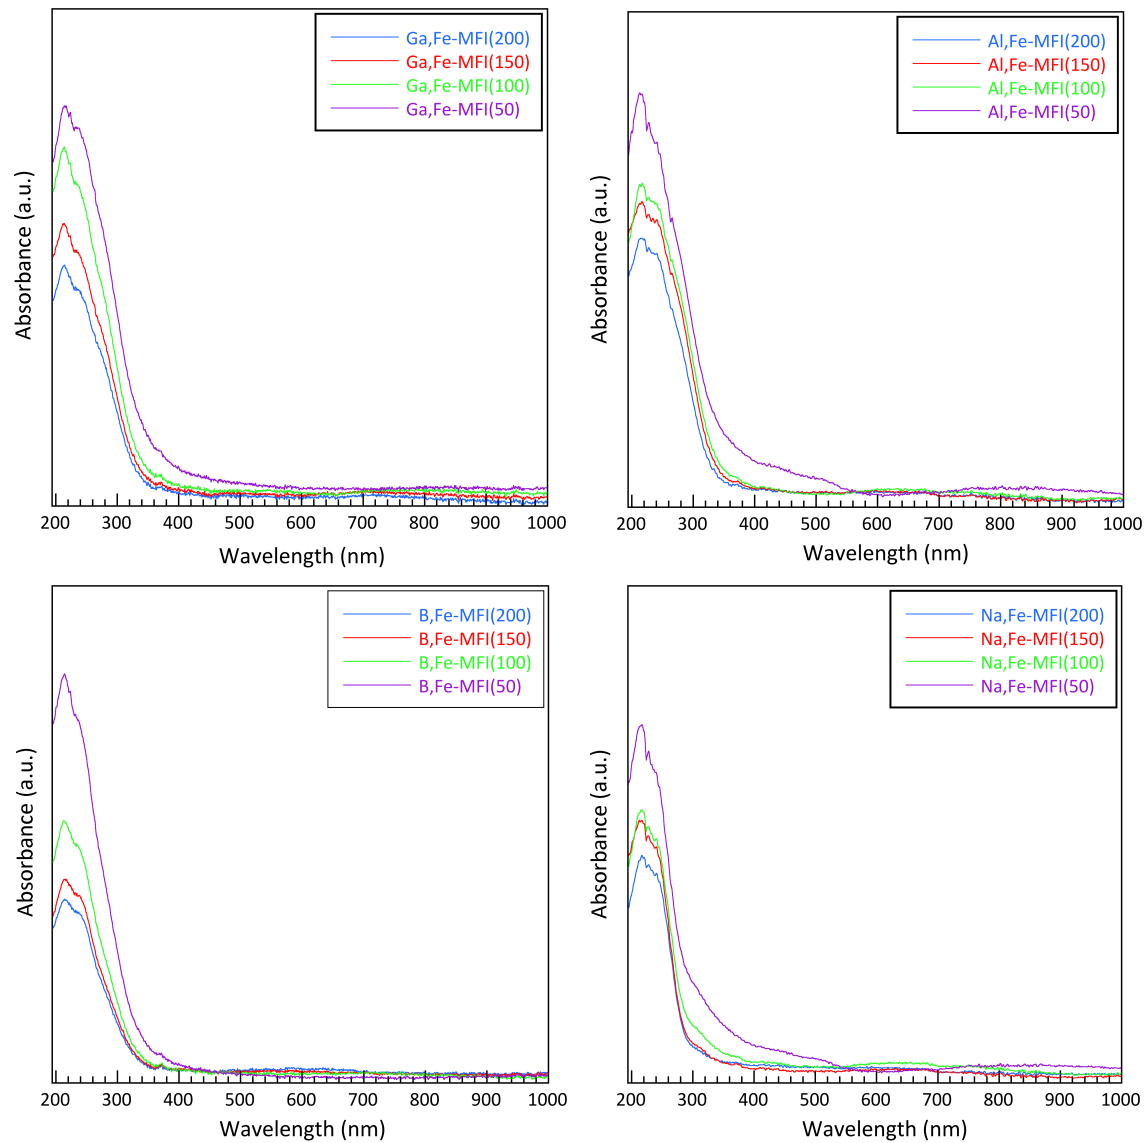

**Figure S5.** Ultraviolet-Visible spectra of calcined Ga,Fe-MFI, Al,Fe-MFI, B,Fe-MFI, and Na,Fe-MFI zeolites in the range of 194-1000 nm under ambient conditions.

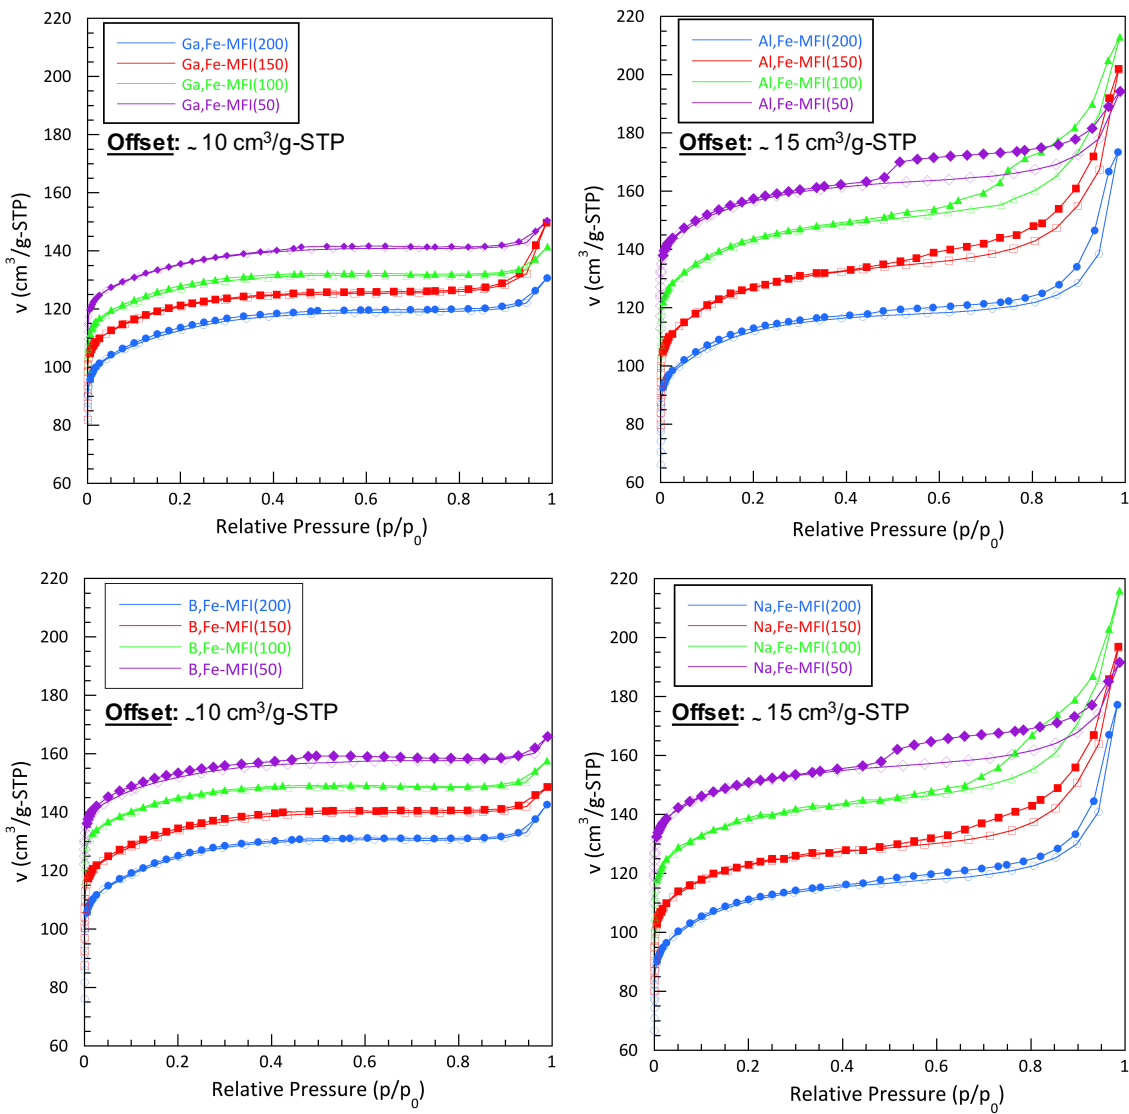

**Figure S6.**  $\text{N}_2$  adsorption-desorption isotherms of outgassed Ga,Fe-MFI, Al,Fe-MFI, B,Fe-MFI, and Na,Fe-MFI zeolites. ( $60 < v \text{ (cm}^3/\text{g-STP)} < 220$ )

| Sample Name    | V <sub>Micropore</sub> (cm <sup>3</sup> /g-STP) | V <sub>Total</sub> (cm <sup>3</sup> /g-STP) | S <sub>BET</sub> (m <sup>2</sup> /g) | V <sub>Mesopore</sub> (cm <sup>3</sup> /g-STP) |
|----------------|-------------------------------------------------|---------------------------------------------|--------------------------------------|------------------------------------------------|
| Ga,Fe-MFI(200) | 0.1404                                          | 0.2023                                      | 355                                  | 0.0619                                         |
| Ga,Fe-MFI(150) | 0.1344                                          | 0.2052                                      | 326                                  | 0.0708                                         |
| Ga,Fe-MFI(100) | 0.1324                                          | 0.1834                                      | 327                                  | 0.0510                                         |
| Ga,Fe-MFI(50)  | 0.1294                                          | 0.1817                                      | 322                                  | 0.0523                                         |
| Al,Fe-MFI(200) | 0.1428                                          | 0.2783                                      | 352                                  | 0.1355                                         |
| Al,Fe-MFI(150) | 0.1382                                          | 0.2890                                      | 354                                  | 0.1508                                         |
| Al,Fe-MFI(100) | 0.1365                                          | 0.2832                                      | 357                                  | 0.1467                                         |
| Al,Fe-MFI(50)  | 0.1337                                          | 0.2232                                      | 336                                  | 0.0895                                         |
| B,Fe-MFI(200)  | 0.1570                                          | 0.2207                                      | 392                                  | 0.0637                                         |
| B,Fe-MFI(150)  | 0.1499                                          | 0.2069                                      | 373                                  | 0.057                                          |
| B,Fe-MFI(100)  | 0.1345                                          | 0.1821                                      | 328                                  | 0.0476                                         |
| B,Fe-MFI(50)   | 0.1302                                          | 0.1793                                      | 320                                  | 0.0491                                         |
| Na,Fe-MFI(200) | 0.1394                                          | 0.2743                                      | 348                                  | 0.1349                                         |
| Na,Fe-MFI(150) | 0.1379                                          | 0.2809                                      | 339                                  | 0.143                                          |
| Na,Fe-MFI(100) | 0.1348                                          | 0.2870                                      | 341                                  | 0.1522                                         |
| Na,Fe-MFI(50)  | 0.1310                                          | 0.2269                                      | 332                                  | 0.0959                                         |

**Table S1.** Physical properties of calcined Ga,Fe-MFI, Al,Fe-MFI, B,Fe-MFI, and Na,Fe-MFI zeolites.



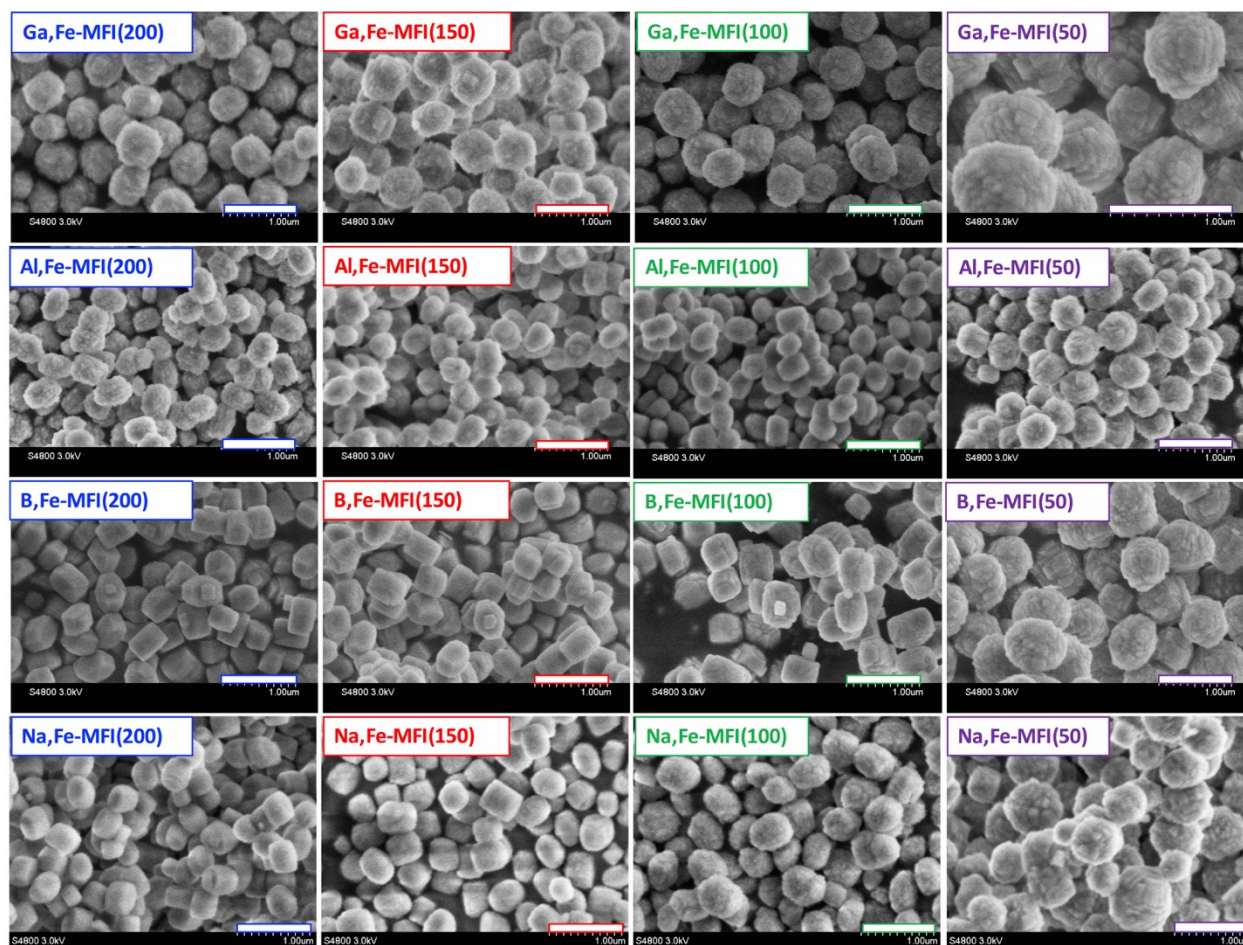

**Figure S7.** FE-SEM images of Ga,Fe-MFI, Al,Fe-MFI, B,Fe-MFI, and Na,Fe-MFI zeolites. The scale bar in all images is 1  $\mu\text{m}$ .

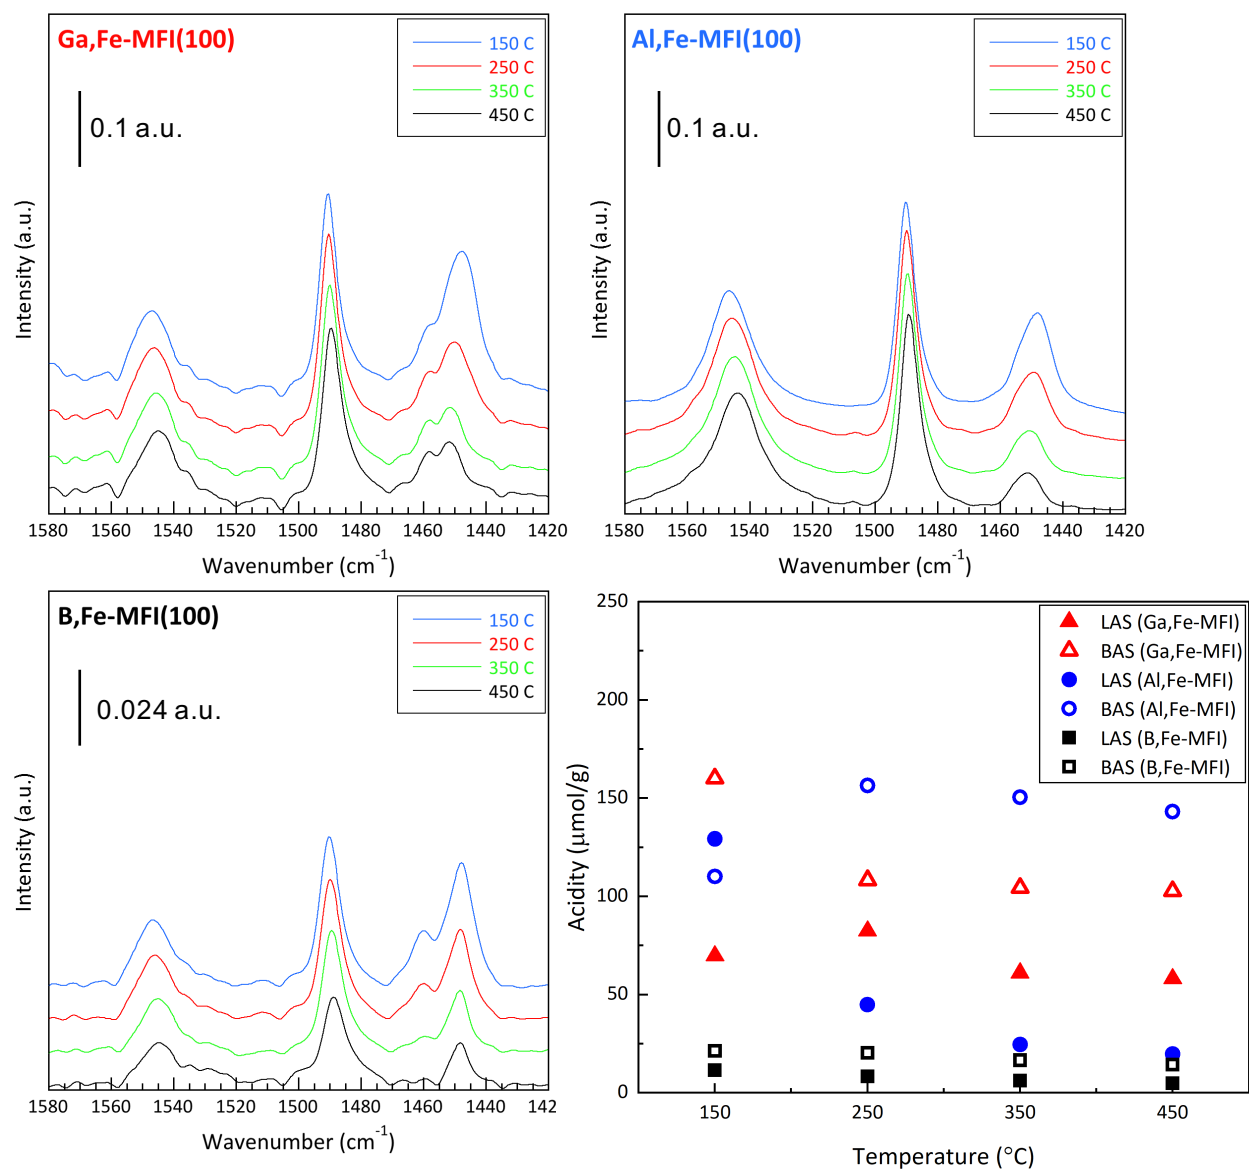

**Figure S8.** FT-IR spectra of pyridine adsorbed at different temperatures over M,Fe-MFI(100) zeolites as well as calculated concentration of Brönsted and Lewis acidities at different temperatures.

| Sample Name    | Theoretical wt% |               | Final wt% (EDX) |               |          | Uptake (%) |               |
|----------------|-----------------|---------------|-----------------|---------------|----------|------------|---------------|
|                | Fe (wt%)        | Ga/Al/B (wt%) | Fe (wt%)        | Ga/Al/B (wt%) | Na (wt%) | Fe (wt%)   | Ga/Al/B (wt%) |
| Ga,Fe-MFI(200) | 0.45            | 1.89          | 0.44            | 1.48          | -        | 96.95      | 78.36         |
| Ga,Fe-MFI(150) | 0.60            | 1.89          | 0.56            | 1.48          | -        | 92.68      | 78.48         |
| Ga,Fe-MFI(100) | 0.90            | 1.88          | 0.81            | 1.49          | -        | 89.64      | 79.25         |
| Ga,Fe-MFI(50)  | 1.79            | 1.86          | 1.63            | 1.5           | -        | 91.01      | 80.50         |
| Al,Fe-MFI(200) | 0.46            | 0.74          | 0.45            | 0.73          | -        | 98.01      | 98.72         |
| Al,Fe-MFI(150) | 0.61            | 0.74          | 0.55            | 0.6           | -        | 89.98      | 81.26         |
| Al,Fe-MFI(100) | 0.91            | 0.74          | 0.75            | 0.57          | -        | 82.05      | 77.44         |
| Al,Fe-MFI(50)  | 1.81            | 0.73          | 1.41            | 0.55          | -        | 77.83      | 75.40         |
| B,Fe-MFI(200)  | 0.46            | 0.30          | 0.45            | -             | -        | 97.57      | -             |
| B,Fe-MFI(150)  | 0.61            | 0.30          | 0.60            | -             | -        | 97.72      | -             |
| B,Fe-MFI(100)  | 0.92            | 0.30          | 0.89            | 0.13          | -        | 96.93      | 43.88         |
| B,Fe-MFI(50)   | 1.82            | 0.29          | 1.65            | 0.11          | -        | 90.68      | 37.47         |
| Na,Fe-MFI(200) | 0.46            | 0.74          | 0.44            | 0.71          | 0.61     | 95.83      | 96.01         |
| Na,Fe-MFI(150) | 0.61            | 0.74          | 0.53            | 0.67          | 0.6      | 86.70      | 90.74         |
| Na,Fe-MFI(100) | 0.91            | 0.74          | 0.77            | 0.56          | 0.66     | 84.23      | 76.08         |
| Na,Fe-MFI(50)  | 1.81            | 0.73          | 1.39            | 0.55          | 0.86     | 76.73      | 75.40         |

**Table S2.** Theoretical wt%, actual wt%, and percent uptake of heteroatoms for all samples.

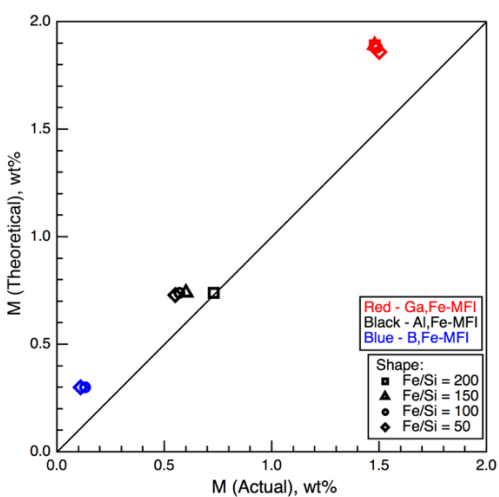

Plot of final wt% of M versus initial wt% of M for all catalysts. (M: Ga, Al, and B)

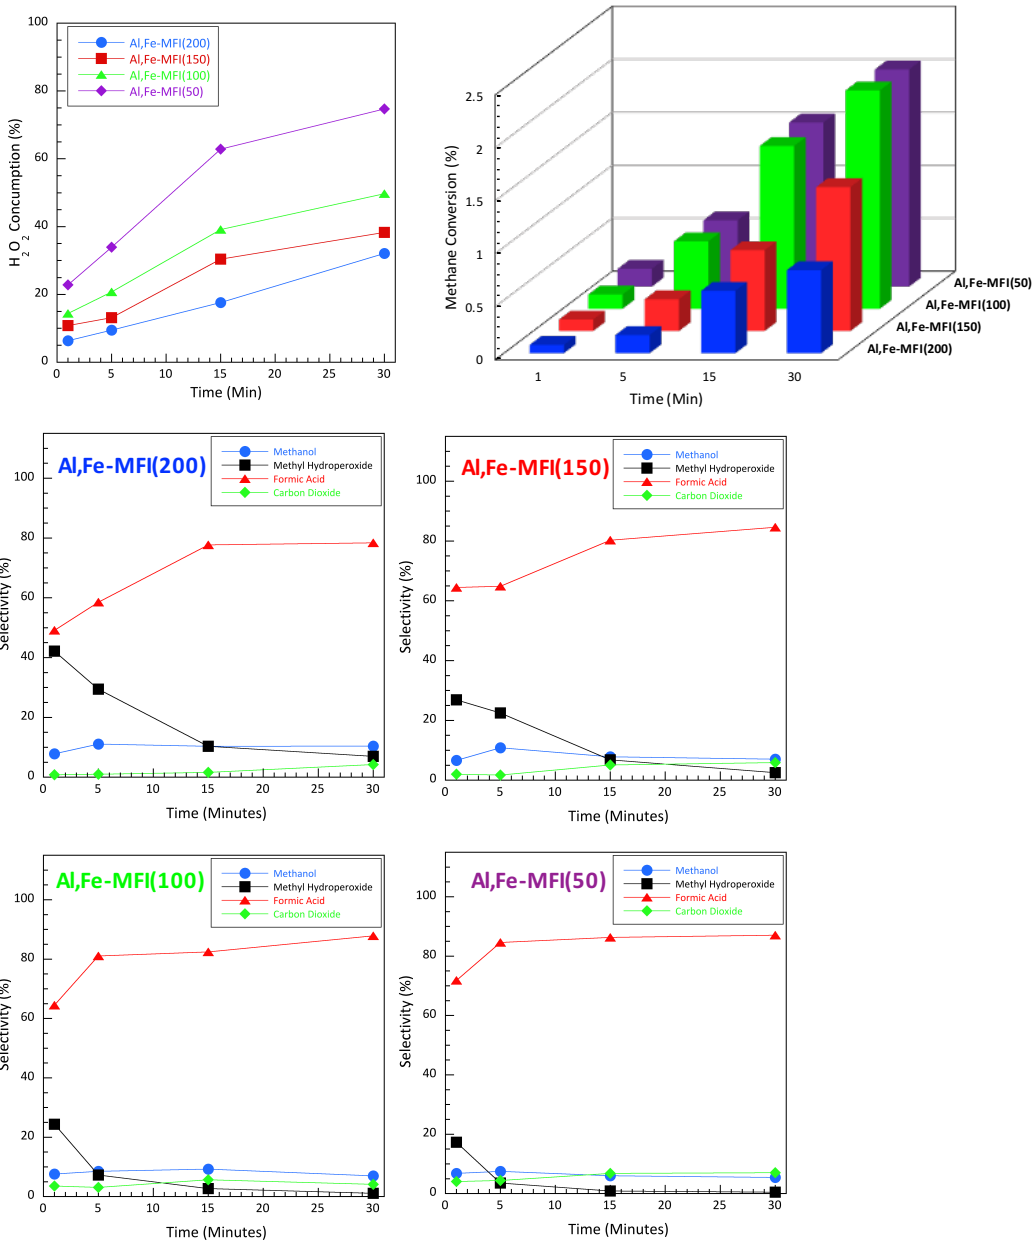

**Figure S9.** Hydrogen peroxide consumption (top left), methane conversion (top right), and selectivity profiles (bottom) versus time for a reaction in which Al,Fe-MFI zeolites were used as catalysts. Reaction conditions: CH<sub>4</sub> Pressure: 443 psi, T: 55 °C, Amounts of catalyst 28 mg, Concentration of H<sub>2</sub>O<sub>2</sub>: 0.5 M, Volume of used H<sub>2</sub>O<sub>2</sub>: 10 mL, 1500 rpm.

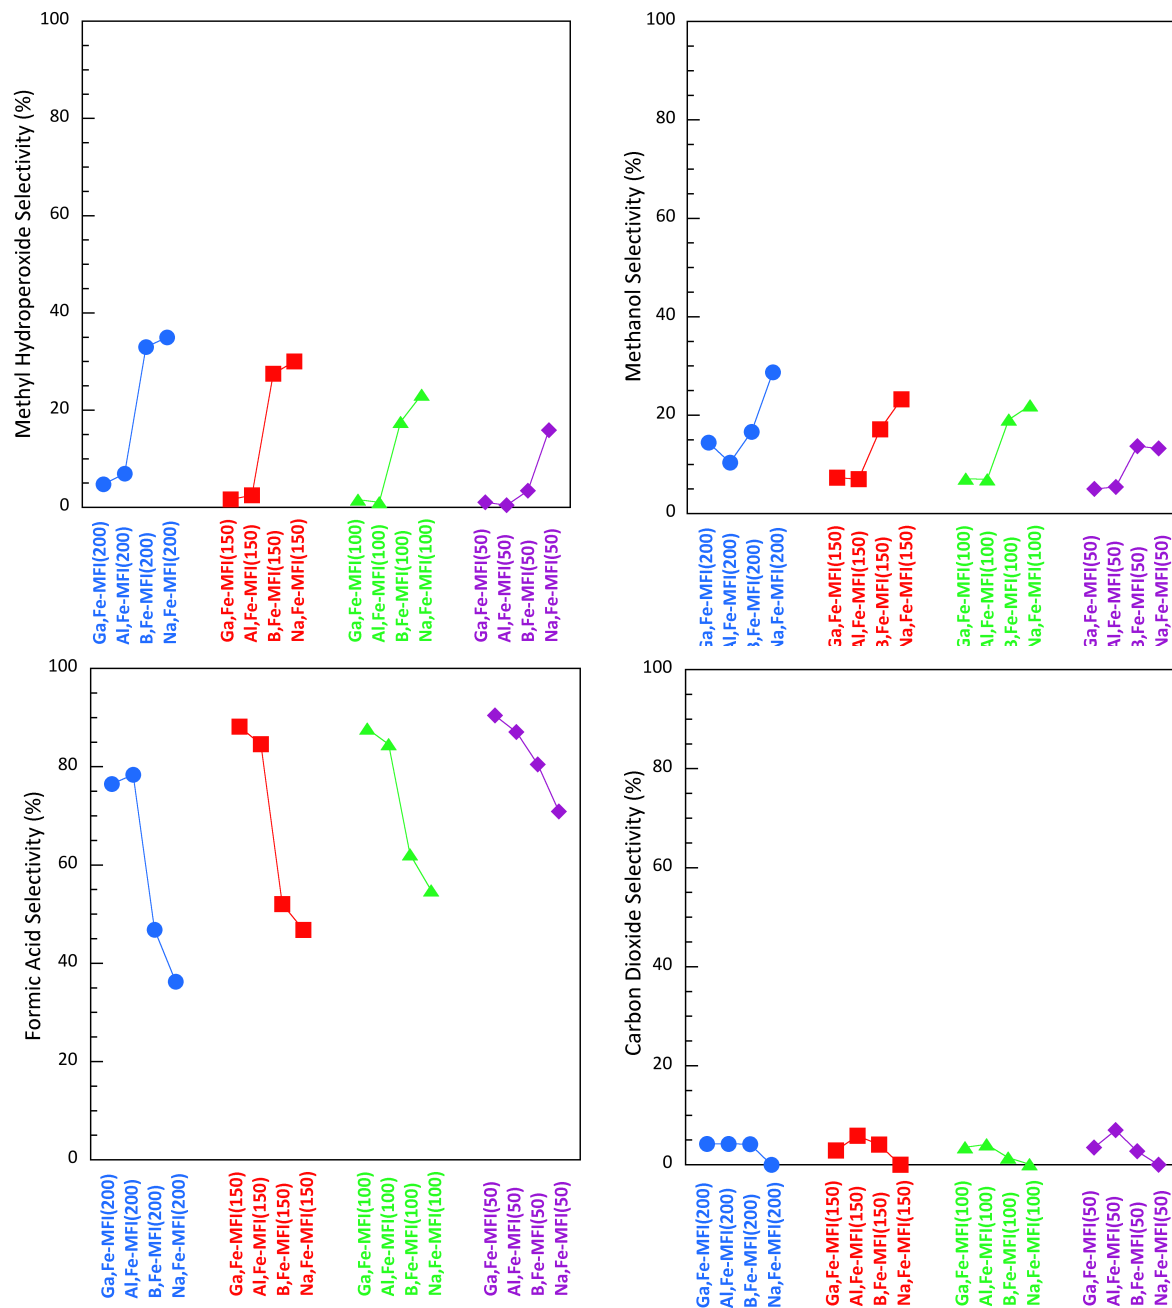

**Figure S10.** Selectivity profiles versus various catalysts. Conditions are similar for all the reactions: CH<sub>4</sub> Pressure: 443 psi, T: 55 °C, Amounts of catalyst: 28 mg, Concentration of H<sub>2</sub>O<sub>2</sub>: 0.5 M, Volume of H<sub>2</sub>O<sub>2</sub> Solution: 10 mL, 1500 rpm, t: 30 min.

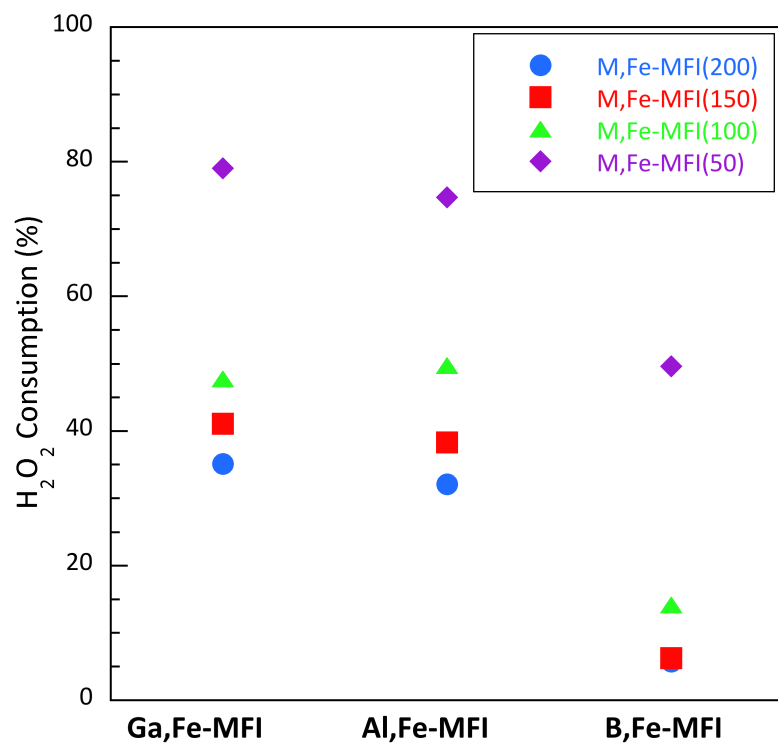

**Figure S11.** Hydrogen peroxide consumption versus various catalysts. Conditions are similar for all the reactions: CH<sub>4</sub> Pressure: 443 psi, T: 55 °C, Amounts of catalyst: 28 mg, Concentration of H<sub>2</sub>O<sub>2</sub>: 0.5 M, Volume of H<sub>2</sub>O<sub>2</sub> Solution: 10 mL, 1500 rpm, t: 30 min. (M: Ga, Al, B)

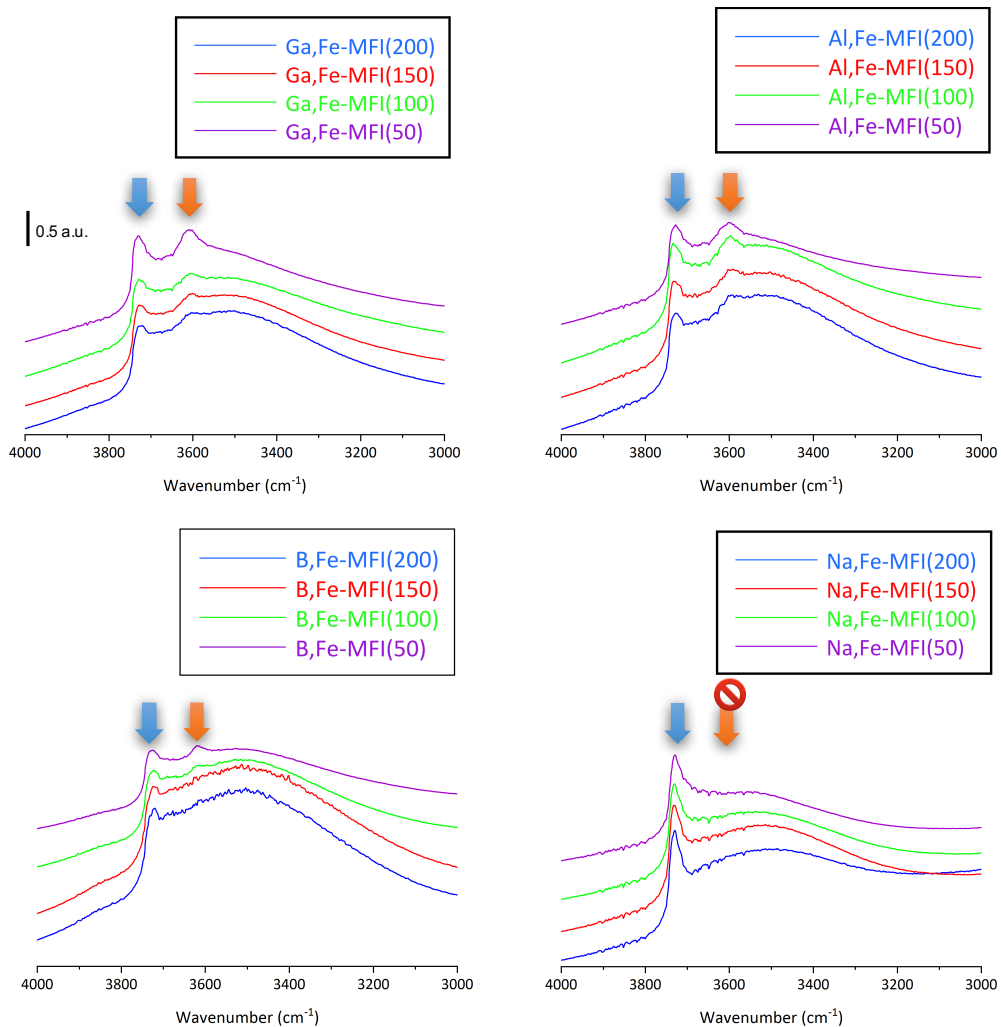

**Figure S12.** IR spectra of calcined Ga,Fe-MFI, Al,Fe-MFI, B,Fe-MFI, and Na,Fe-MFI materials under the vacuum ( $10^{-5}$  Torr) at 500 °C for 30 min in the range of 4000-3000  $\text{cm}^{-1}$ . The indicator shows the Kubelka-Munk Function unit (a.u.).

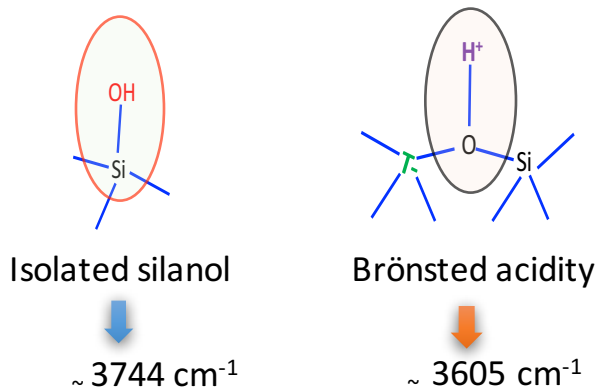

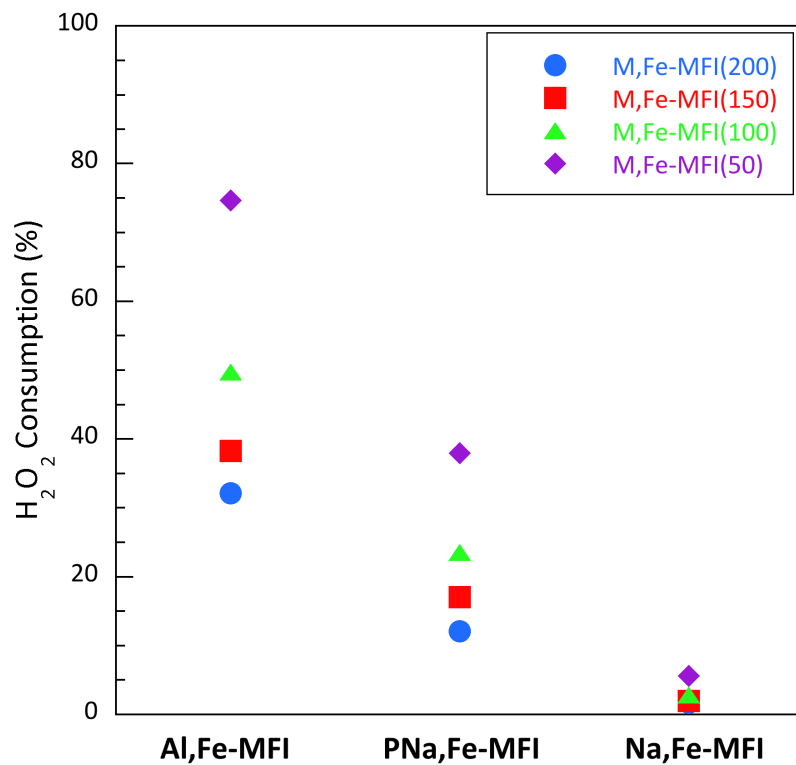

**Figure S13.** Hydrogen peroxide consumption versus various catalysts. Conditions are similar for all the reactions: CH<sub>4</sub> Pressure: 443 psi, T: 55 °C, Amounts of catalyst: 28 mg, Concentration of H<sub>2</sub>O<sub>2</sub>: 0.5 M, Volume of H<sub>2</sub>O<sub>2</sub> Solution: 10 mL, 1500 rpm, t: 30 min. (M, Al, PNa, Na)



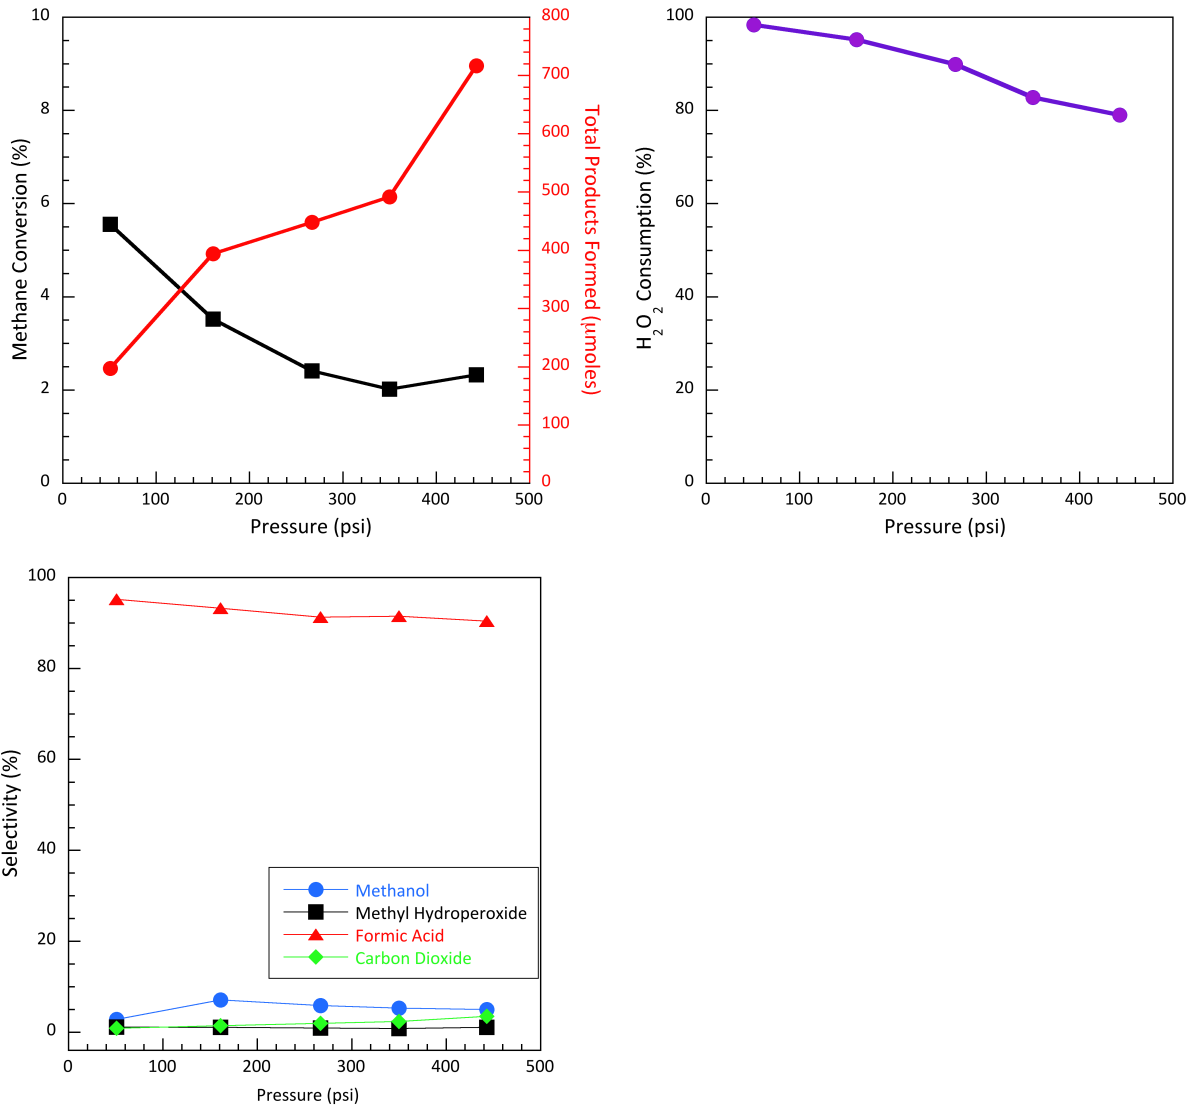

**Figure S14.** Methane conversion/total oxygenated products, hydrogen peroxide consumption, and selectivity profiles as a function of partial pressure of methane over Ga,Fe-MFI(50). T: 55 °C, Weight<sub>catalyst</sub>: 28 mg, Concentration of H<sub>2</sub>O<sub>2</sub>: 0.5 M, Volume of H<sub>2</sub>O<sub>2</sub> Solution: 10 mL, 1500 rpm, t: 30 min.

| Sample         | CH <sub>3</sub> OH<br>( $\mu$ moles) | CH <sub>3</sub> OOH<br>( $\mu$ moles) | HCOOH<br>( $\mu$ moles) | CO <sub>2</sub><br>( $\mu$ moles) | Total Products<br>( $\mu$ moles) | Total Productivity<br>(moles. Kg <sup>-1</sup> Catalyst. h <sup>-1</sup> ) |
|----------------|--------------------------------------|---------------------------------------|-------------------------|-----------------------------------|----------------------------------|----------------------------------------------------------------------------|
| Ga,Fe-MFI(200) | 39.52                                | 13.08                                 | 209.19                  | 11.65                             | 273.44                           | 19.53                                                                      |
| Ga,Fe-MFI(150) | 33.07                                | 7.59                                  | 400.27                  | 13.12                             | 454.05                           | 32.43                                                                      |
| Ga,Fe-MFI(100) | 44.59                                | 10.07                                 | 549.62                  | 22.02                             | 626.31                           | 44.74                                                                      |
| Ga,Fe-MFI(50)  | 35.98                                | 7.71                                  | 648.05                  | 25.00                             | 716.73                           | 51.20                                                                      |
| Al,Fe-MFI(200) | 24.57                                | 16.42                                 | 185.11                  | 10.00                             | 236.10                           | 16.86                                                                      |
| Al,Fe-MFI(150) | 28.69                                | 10.21                                 | 345.79                  | 24.00                             | 408.70                           | 29.19                                                                      |
| Al,Fe-MFI(100) | 43.17                                | 6.67                                  | 530.86                  | 39.41                             | 620.10                           | 44.29                                                                      |
| Al,Fe-MFI(50)  | 33.51                                | 2.98                                  | 536.73                  | 43.38                             | 616.60                           | 44.04                                                                      |
| B,Fe-MFI(200)  | 8.14                                 | 16.13                                 | 22.89                   | 1.70                              | 48.87                            | 3.49                                                                       |
| B,Fe-MFI(150)  | 9.14                                 | 14.69                                 | 27.79                   | 1.80                              | 53.42                            | 3.82                                                                       |
| B,Fe-MFI(100)  | 26.04                                | 23.95                                 | 84.77                   | 1.61                              | 136.36                           | 9.74                                                                       |
| B,Fe-MFI(50)   | 31.55                                | 7.98                                  | 185.31                  | 5.41                              | 230.25                           | 16.45                                                                      |
| Na,Fe-MFI(200) | 1.06                                 | 1.30                                  | 1.34                    | 0.00                              | 3.70                             | 0.26                                                                       |
| Na,Fe-MFI(150) | 1.16                                 | 1.50                                  | 2.34                    | 0.00                              | 5.00                             | 0.36                                                                       |
| Na,Fe-MFI(100) | 4.03                                 | 4.24                                  | 10.01                   | 0.02                              | 18.30                            | 1.31                                                                       |
| Na,Fe-MFI(50)  | 3.97                                 | 4.77                                  | 21.25                   | 0.01                              | 30.00                            | 2.14                                                                       |

**Table S3.** Catalytic studies of various (Ga/Al/B/Na),Fe-MFI zeolites for oxidation of methane under mild conditions. Conditions are similar for all the reactions: CH<sub>4</sub> Pressure: 443 psi, T: 55 °C, Weight<sub>Catalyst</sub>: 28 mg, Concentration of H<sub>2</sub>O<sub>2</sub>: 0.5 M, Volume of H<sub>2</sub>O<sub>2</sub> Solution: 10 mL, 1500 rpm, t: 30 min.

| Sample         | S <sub>CH<sub>3</sub>OH</sub><br>(%) | S <sub>CH<sub>3</sub>OOH</sub><br>(%) | S <sub>HCOOH</sub><br>(%) | S <sub>CO<sub>2</sub></sub><br>(%) | TOF<br>(h <sup>-1</sup> ) |
|----------------|--------------------------------------|---------------------------------------|---------------------------|------------------------------------|---------------------------|
| Ga,Fe-MFI(200) | 14.45                                | 4.78                                  | 76.50                     | 4.26                               | 247.9                     |
| Ga,Fe-MFI(150) | 7.28                                 | 1.67                                  | 88.16                     | 2.89                               | 317.7                     |
| Ga,Fe-MFI(100) | 7.12                                 | 1.61                                  | 87.76                     | 3.52                               | 308.4                     |
| Ga,Fe-MFI(50)  | 5.02                                 | 1.08                                  | 90.42                     | 3.49                               | 175.4                     |
| Al,Fe-MFI(200) | 10.41                                | 6.95                                  | 78.40                     | 4.24                               | 209.3                     |
| Al,Fe-MFI(150) | 7.02                                 | 2.50                                  | 84.61                     | 5.87                               | 296.4                     |
| Al,Fe-MFI(100) | 6.96                                 | 1.08                                  | 85.61                     | 6.36                               | 329.8                     |
| Al,Fe-MFI(50)  | 5.44                                 | 0.48                                  | 87.05                     | 7.04                               | 174.4                     |
| B,Fe-MFI(200)  | 16.65                                | 33.02                                 | 46.85                     | 3.48                               | 57.3                      |
| B,Fe-MFI(150)  | 17.10                                | 27.50                                 | 52.03                     | 3.37                               | 38.7                      |
| B,Fe-MFI(100)  | 19.10                                | 17.56                                 | 62.16                     | 1.18                               | 71.6                      |
| B,Fe-MFI(50)   | 13.70                                | 3.47                                  | 80.48                     | 2.35                               | 58.9                      |
| Na,Fe-MFI(200) | 28.73                                | 35.00                                 | 36.28                     | 0.00                               | 3.4                       |
| Na,Fe-MFI(150) | 23.23                                | 30.00                                 | 46.77                     | 0.00                               | 3.8                       |
| Na,Fe-MFI(100) | 22.00                                | 23.15                                 | 54.72                     | 0.13                               | 9.5                       |
| Na,Fe-MFI(50)  | 13.23                                | 15.90                                 | 70.84                     | 0.03                               | 8.6                       |

**Table S4.** Selectivity profile and turnover frequency for all the reactions in which (Ga/Al/B/Na),Fe-MFI zeolites were used. Conditions are similar for all the reactions: CH<sub>4</sub> Pressure: 443 psi, T: 55 °C, Weight<sub>catalyst</sub>: 28 mg, Concentration of H<sub>2</sub>O<sub>2</sub>: 0.5 M, Volume of H<sub>2</sub>O<sub>2</sub> Solution: 10 mL, 1500 rpm, t: 30 min.
